# Supplementary material for: Associations of Diet Quality and Sleep Quality with Obesity
Source: MDPI journal article supplement (doi:10.3390/nu13093181), 2021-09-13
Supplement: s1 [file s1]

Supplementary file

**Table S1. Correlation between Recommended Food Score (RFS) and serum carotenoid concentrations.**

|                        | Men ( <i>n</i> =737)    |                   | Women ( <i>n</i> =428)  |                   |
|------------------------|-------------------------|-------------------|-------------------------|-------------------|
|                        | Correlation coefficient | <i>p</i> -Value * | Correlation coefficient | <i>p</i> -Value * |
| Total carotenoids (μM) | 0.081                   | 0.027             | 0.135                   | 0.005             |
| Lutein (μM)            | 0.076                   | 0.040             | 0.110                   | 0.023             |
| Zeaxanthin (μM)        | 0.010                   | 0.781             | 0.067                   | 0.167             |
| β-cryptoxanthin (μM)   | 0.037                   | 0.313             | 0.104                   | 0.031             |
| α-carotene (μM)        | 0.056                   | 0.130             | 0.135                   | 0.005             |
| β-carotene (μM)        | 0.106                   | 0.004             | 0.139                   | 0.004             |

\* Correlation coefficient and *p*-values were obtained by Pearson's correlation analysis.

**Table S2. Blood pressure and blood profiles according to Recommended Food Score (RFS).**

|                        | Men              |                                      |                                      |                   |                    | Women            |                                      |                                      |                   |                    |                   |
|------------------------|------------------|--------------------------------------|--------------------------------------|-------------------|--------------------|------------------|--------------------------------------|--------------------------------------|-------------------|--------------------|-------------------|
|                        | Total<br>(N=737) | RFS ≤ median <sup>†</sup><br>(N=377) | RFS > median <sup>†</sup><br>(N=360) | <i>p</i> -Value * | <i>p</i> -Value ** | Total<br>(N=428) | RFS ≤ median <sup>†</sup><br>(N=220) | RFS > median <sup>†</sup><br>(N=208) | <i>p</i> -Value * | <i>p</i> -Value ** | <i>p</i> -Value ‡ |
| SBP (mmHg)             | 123.6 ± 12.6     | 123.3 ± 12.8                         | 123.9 ± 12.3                         | 0.524             | 0.584              | 110.8 ± 13.2     | 110.1 ± 13.5                         | 111.5 ± 12.7                         | 0.267             | 0.727              | <.0001            |
| DBP (mmHg)             | 84.1 ± 10.0      | 83.8 ± 10.0                          | 84.4 ± 9.9                           | 0.440             | 0.635              | 76.4 ± 8.9       | 76.5 ± 9.4                           | 76.4 ± 8.2                           | 0.940             | 0.661              | <.0001            |
| FG (mg/dl)             | 95.5 ± 17.8      | 94.7 ± 17.7                          | 96.3 ± 17.8                          | 0.185             | 0.696              | 91.2 ± 18.8      | 90.8 ± 18.0                          | 91.5 ± 19.7                          | 0.710             | 0.781              | <.0001            |
| TG (mg/dl)             | 130.7 ± 80.9     | 135.7 ± 87.5                         | 125.4 ± 73.1                         | 0.105             | 0.240              | 91.9 ± 56.5      | 94.3 ± 63.1                          | 89.3 ± 48.6                          | 0.361             | 0.280              | <.0001            |
| Cholesterol (mg/dl)    | 198.3 ± 35.3     | 198.9 ± 35.8                         | 197.7 ± 34.8                         | 0.690             | 0.611              | 193.5 ± 34.1     | 192.2 ± 32.8                         | 194.9 ± 35.4                         | 0.426             | 0.988              | 0.027             |
| HDL-C (mg/dl)          | 50.4 ± 11.1      | 49.9 ± 10.7                          | 51.05 ± 11.50                        | 0.175             | 0.253              | 60.1 ± 13.9      | 60.8 ± 13.8                          | 59.4 ± 14.1                          | 0.323             | 0.807              | <.0001            |
| LDL-C (mg/dl)          | 120.8 ± 35.1     | 120.5 ± 36.3                         | 121.2 ± 33.9                         | 0.834             | 0.641              | 114.5 ± 32.7     | 111.6 ± 33.0                         | 117.6 ± 32.3                         | 0.058             | 0.593              | 0.0007            |
| Total carotenoids (μM) | 6.8 ± 8.0        | 6.0 ± 5.9                            | 7.6 ± 9.7                            | <.0001            | 0.057              | 10.6 ± 13.6      | 9.4 ± 10.8                           | 11.9 ± 16.1                          | 0.059             | 0.177              | <.0001            |
| Lutein (μM)            | 0.8 ± 0.9        | 0.7 ± 0.7                            | 0.9 ± 1.0                            | 0.002             | 0.117              | 1.05 ± 1.7       | 1.0 ± 1.6                            | 1.2 ± 1.7                            | 0.224             | 0.432              | 0.0004            |
| Zeaxanthine (μM)       | 0.4 ± 0.5        | 0.4 ± 0.5                            | 0.4 ± 0.5                            | 0.424             | 0.828              | 0.4 ± 0.8        | 0.4 ± 0.8                            | 0.4 ± 0.8                            | 0.521             | 0.500              | 0.227             |
| β-cryptoxanthin (μM)   | 1.8 ± 2.6        | 1.7 ± 2.2                            | 2.0 ± 2.9                            | 0.003             | 0.261              | 2.7 ± 5.4        | 2.4 ± 3.8                            | 3.0 ± 6.7                            | 0.254             | 0.384              | 0.0002            |
| α-carotene (μM)        | 0.2 ± 0.3        | 0.2 ± 0.2                            | 0.3 ± 0.3                            | 0.049             | 0.141              | 0.3 ± 0.4        | 0.3 ± 0.3                            | 0.4 ± 0.5                            | 0.018             | 0.049              | <.0001            |
| β-carotene (μM)        | 3.5 ± 4.5        | 3.0 ± 2.9                            | 4.1 ± 5.7                            | <.0001            | 0.021              | 6.1 ± 7.1        | 5.4 ± 6.0                            | 6.9 ± 8.1                            | 0.024             | 0.121              | <.0001            |

Abbreviations: SBP, systolic blood pressure; DBP, diastolic blood pressure; FG, fasting glucose; TG, triglycerides; HDL-C, high-density lipoprotein cholesterol; LDL-C, low-density lipoprotein cholesterol;

Data are presented as mean±SD.

†RFS median values are 23 in men and 21 in women.

\**p*-values were obtained by RFS median using Student's *t*-test.

\*\**p*-values were obtained by RFS median using General linear model adjustment for age, marital status, smoking, physical activity, and menopause status (women only).

‡*p*-values were obtained by sex using Student's *t*-test for continuous variables or chi-square tests for categorical variables.
